# Supplementary material for: Exercise-Induced Irisin Decreases Inflammation and Improves NAFLD by Competitive Binding with MD2
Source: MDPI journal article supplement (doi:10.3390/cells10123306), 2021-11-25
Supplement: s1 [file s1]

**Supplementary Table S1. Antibody list**

| <b>Antibody</b>        | <b>Source</b> | <b>Company</b> | <b>Cat No.</b> |
|------------------------|---------------|----------------|----------------|
| $\beta$ -Tubulin       | Rabbit        | CST            | 2146           |
| FABP4                  | Rabbit        | CST            | 3544           |
| COL1A1                 | Rabbit        | CST            | 72026          |
| F4/80                  | Rabbit        | CST            | 70076          |
| NLRP3                  | Rabbit        | CST            | 15101          |
| Caspase-1              | Rabbit        | CST            | 3866           |
| Cleaved GSDMD          | Rabbit        | CST            | 50928          |
| p-ERK1/2               | Rabbit        | CST            | 9101           |
| ERK1/2                 | Rabbit        | CST            | 9102           |
| p-JNK                  | Rabbit        | CST            | 9251           |
| JNK                    | Rabbit        | CST            | 9252           |
| p38                    | Rabbit        | CST            | 8690           |
| p-p65                  | Rabbit        | CST            | 3033           |
| p65                    | Rabbit        | CST            | 8242           |
| PPAR $\alpha$          | Mouse         | Santa cruz     | sc-398394      |
| IL-6                   | Mouse         | Santa cruz     | sc-28343       |
| TLR4                   | Mouse         | Santa cruz     | sc-293072      |
| p-p38                  | Mouse         | Santa cruz     | sc-166182      |
| I $\kappa$ B- $\alpha$ | Mouse         | Santa cruz     | sc-1643        |
| TGF $\beta$ 1          | Rabbit        | Abcam          | ab92486        |
| GSDMD                  | Rabbit        | Abcam          | ab155233       |
| MD2                    | Rabbit        | Abcam          | ab24182        |
| MD2                    | Mouse         | Invitrogen     | MA5-15766      |
| Irisin (Biotin)        | Rabbit        | Adipogen       | AG-25B-0027B   |

**Supplementary Table S2. Mouse primers used for real-time qPCR assay**

| <b>Gene</b>  | <b>Forward sequence</b>  | <b>Reverse sequence</b> |
|--------------|--------------------------|-------------------------|
| <i>Fabp4</i> | AAGGTGAAGAGCATCATAACCCCT | TCACGCCTTTCATAACACATTCC |
| <i>Ppara</i> | AGAGCCCCATCTGTCCTCTC     | ACTGGTAGTCTGCAAAACCAAA  |
| <i>Tgfb1</i> | CACCTGCAAGACCATCGACA     | CATAGTAGTCCGCTTCGGGC    |
| <i>Col1</i>  | GCTCCTCTTAGGGGCCACT      | CCACGTCTCACCATTGGGG     |
| <i>Il6</i>   | AGTTGCCTTCTTGGGACTGA     | TCCACGATTTCCAGAGAAC     |
| <i>Il1b</i>  | GCAACTGTTCTGAACTCAACT    | ATCTTTTGGGGTCCGTCAACT   |
| <i>Tnf</i>   | CCCTCACACTCAGATCATCTTCT  | GCTACGACGTGGGCTACAG     |
| <i>Ccl2</i>  | CTTCTGGGCCTGCTGTTCA      | CCAGCCTACTCATTGGGATCA   |
| <i>Icam1</i> | CTGGGCTTGGAGACTCAGTG     | CCACACTCTCCGAAACGAA     |
| <i>Vcam1</i> | AGTTGGGGATTTCGGTTGTTCT   | CCCCTCATTCCTTACCACCC    |
| <i>Md2</i>   | CGCTGCTTTCTCCCATATTGA    | CCTCAGTCTTATGCAGGGTTCA  |
| <i>Tlr4</i>  | ATGGCATGGCTTACACCACC     | GAGGCCAATTTTGTCTCCACA   |
| <i>l8s</i>   | CGAAAGCATTTGCCAAGAAT     | AGTCGGCATCGTTTATGGTC    |

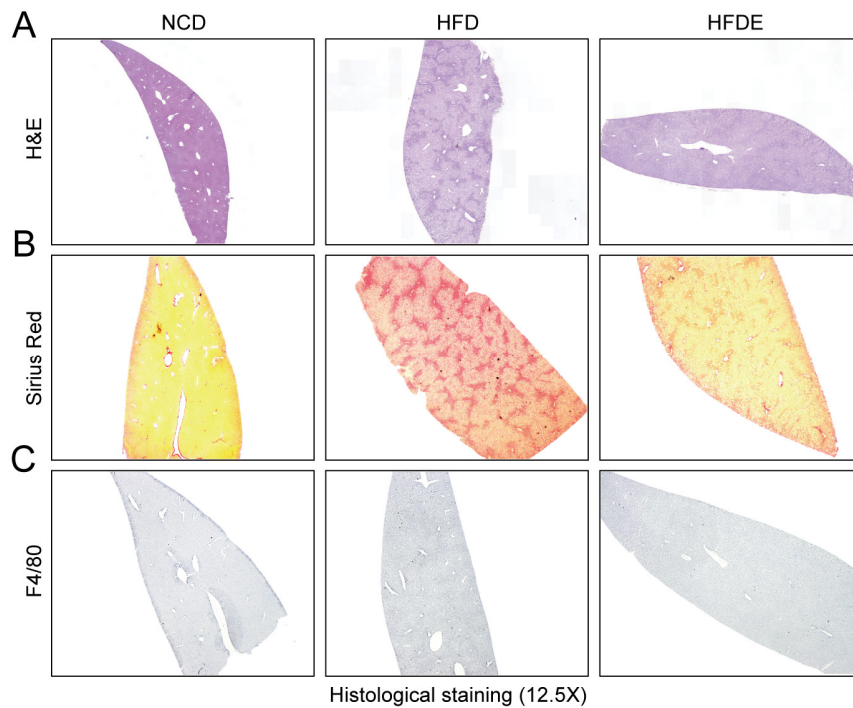

**Supplementary Figure S1: Whole slide imagings of histological staining in liver tissues.** (A) Representative images of liver sections stained by H&E (12.5X). (B) Representative images of liver sections stained by Sirius Red (12.5X). (C) Representative immunohistochemistry staining of liver sections with F4/80 (12.5X).

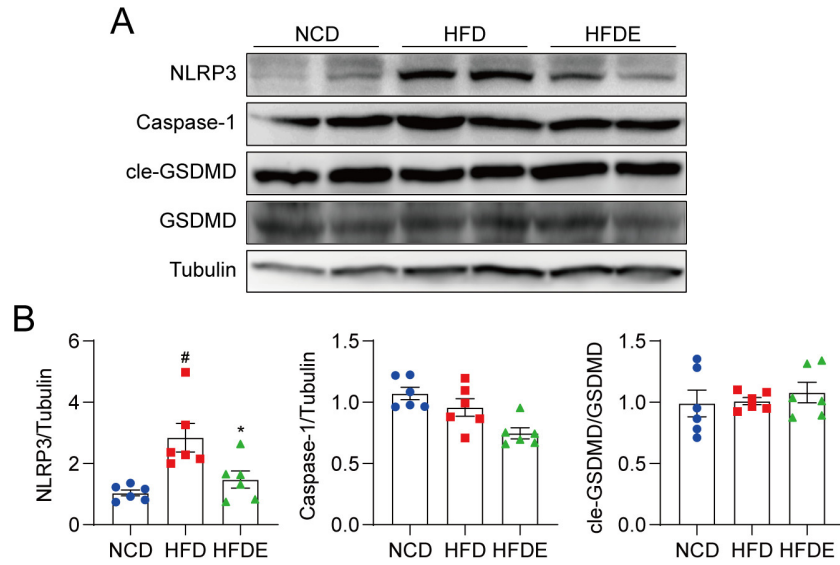

**Supplementary Figure S2: HFD induces NLRP3 inflammasome assemble but not activation in mice liver.** (A) Protein levels of NLRP3, Caspase-1, and cleaved-GSDMD in mice liver tissues, total GSDMD and tubulin were used as the loading control. (B) Densitometric quantifications for (A). Data were presented as mean  $\pm$  SEM. #p vs. NCD group. \*p < 0.05 vs. HFD group.

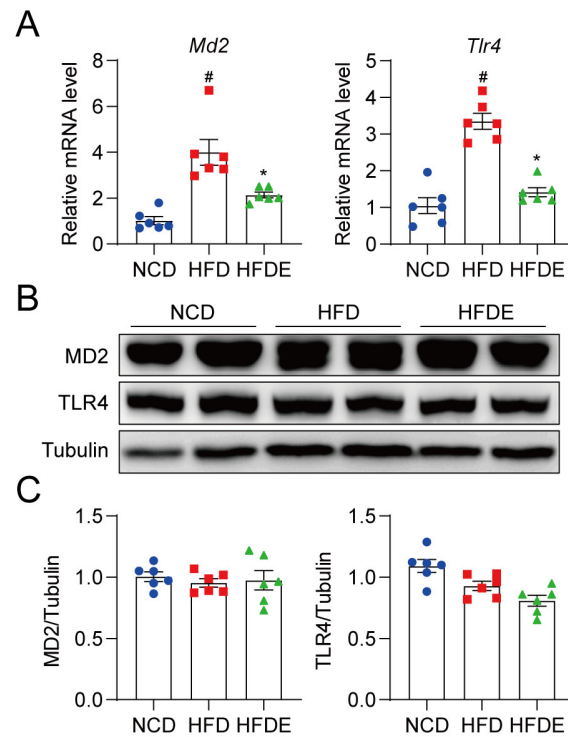

**Supplementary Figure S3: The protein and mRNA change of MD2 and TLR4 in mice liver.** (A) Relative mRNA levels of *Md2* and *Tlr4* in mice liver tissues. (B) Protein levels of MD2 and TLR4 in mice liver tissues, tubulin was used as the loading control. (C) Densitometric quantifications for (B). Data were presented as mean  $\pm$  SEM. #p < 0.05 vs. NCD group. \*p < 0.05 vs. HFD group.

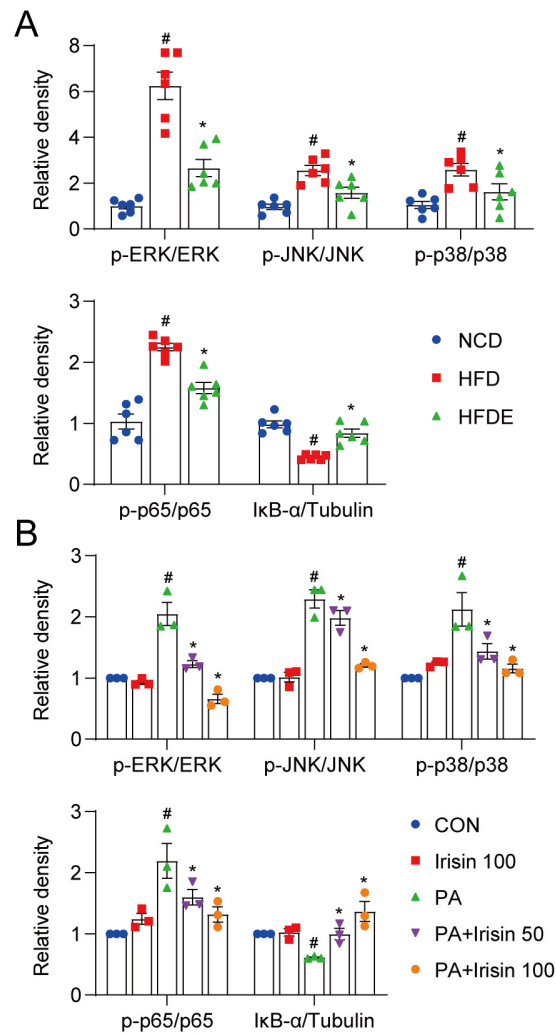

**Supplementary Figure S4: Densitometric quantifications of MAPK and NF- $\kappa$ B pathways in liver tissues and AML12 cells.** (A) Densitometric quantifications for Figure 4B. (B) Densitometric quantifications for Figure 7B. Data were presented as mean  $\pm$  SEM. # $p < 0.05$  vs. NCD or CON group. \* $p < 0.05$  vs. HFD or PA group.

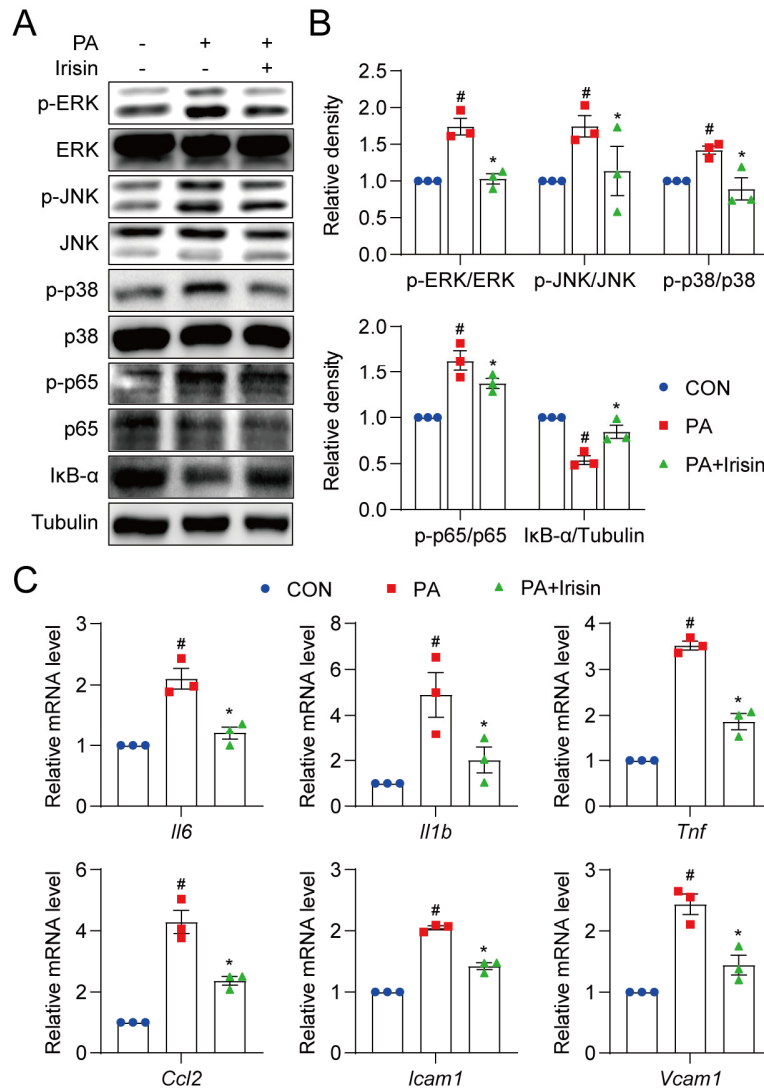

**Supplementary Figure S5: Irisin blocks MAPK and NF-κB pathways to inhibit inflammation in macrophages.** (A) RAW264.7 cells were pre-treated with recombinant irisin (100 ng/ml) for 30 min followed by exposure to 200 μM PA for 2 h. Protein levels of MAPK pathway and NF-κB pathway, including p-ERK, p-JNK, p-p38, p-p65, IκB-α were determined. Corresponded unphosphorylated proteins and tubulin were used as the loading control. (B) Densitometric quantifications for (A). (C) RAW264.7 cells were pre-treated with recombinant irisin (100 ng/ml) for 30 min followed by exposure to 200 μM PA for 12 h. Relative mRNA level of *Il6*, *Il1b*, *Tnf*, *Ccl2*, *Icam1*, and *Vcam1* were detected. Data were presented as mean ± SEM. #p < 0.05 vs. CON group. \*p < 0.05 vs. PA group.
